# Supplementary material
Source: Research Square preprint supplement (doi:10.21203/rs.3.rs-9271975/v1)
Supplement: Supplementary file 1 [file 65be6e30bd82e4a42c704581.pdf]

# TEE SEEDS Knowledge Quiz

1. What are the buttons pointed in the picture called?

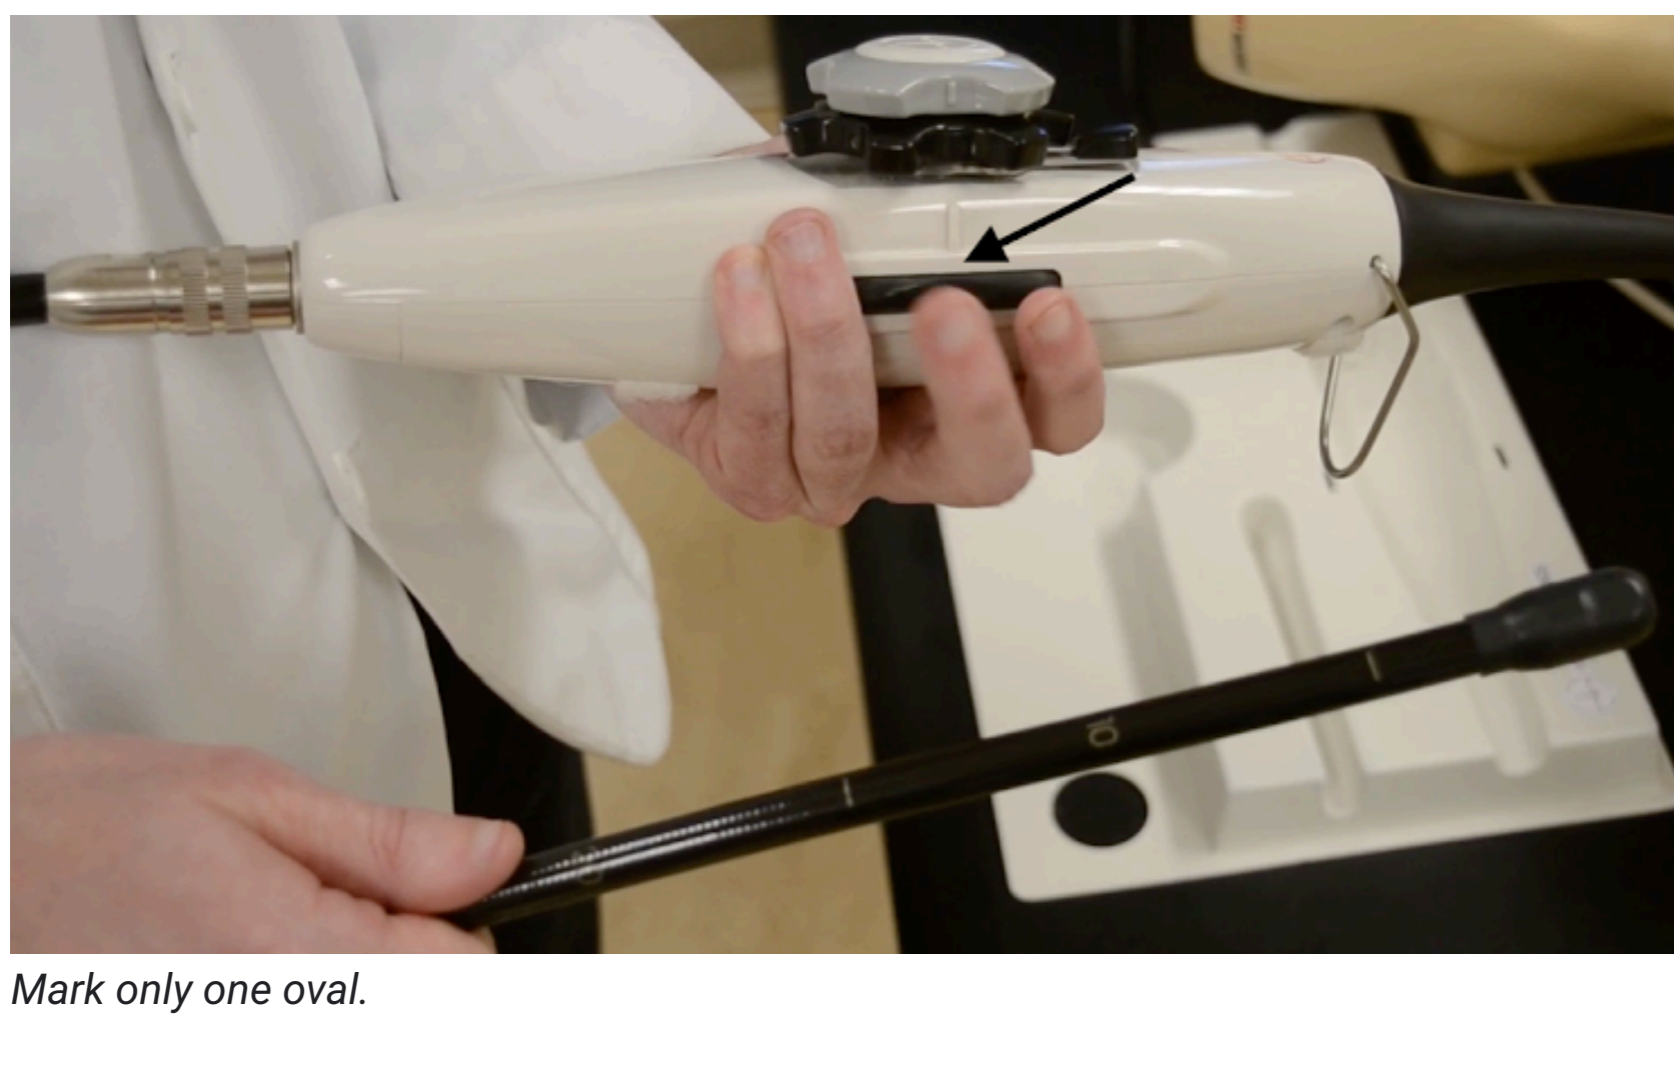

Mark only one oval.

- Lateral flexion
- Anteroflexion/Retroflexion
- Omniplane
- Locking latch

2. When inserting the probe, where should the transducer lens be pointed at?

Mark only one oval.

- Patient's hard palate
- Patient's tongue
- It does not matter. The transducer lens can image in all directions
- Depends on what view the examiner wants to start with.

3. What is the first main landmark use to ensure the probe is being advanced using the correct technique?

Mark only one oval.

- Pulmonary Trunk
- Brachiocephalic a., Left Common Carotid a., Left Subclavian a.
- Aortic Arch
- Brachiocephalic a., Right Common Carotid a., Right Subclavian a.

4. What is the first cardiac view encountered when performing a basic TEE exam?

Mark only one oval.

- Mid-Esophageal Bicaval
- Transgastric Mid-Short Axis
- Mid-Esophageal Long Axis
- Mid-Esophageal Four Chamber

5. What view is used for left ventricular function during cardiac arrest and compression effectiveness during resuscitation?

Mark only one oval.

- Mid-Esophageal Bicaval
- Transgastric Mid-Short Axis
- Mid-Esophageal Long Axis
- Mid-Esophageal Four Chamber

6. What chamber is highlighted in this view?

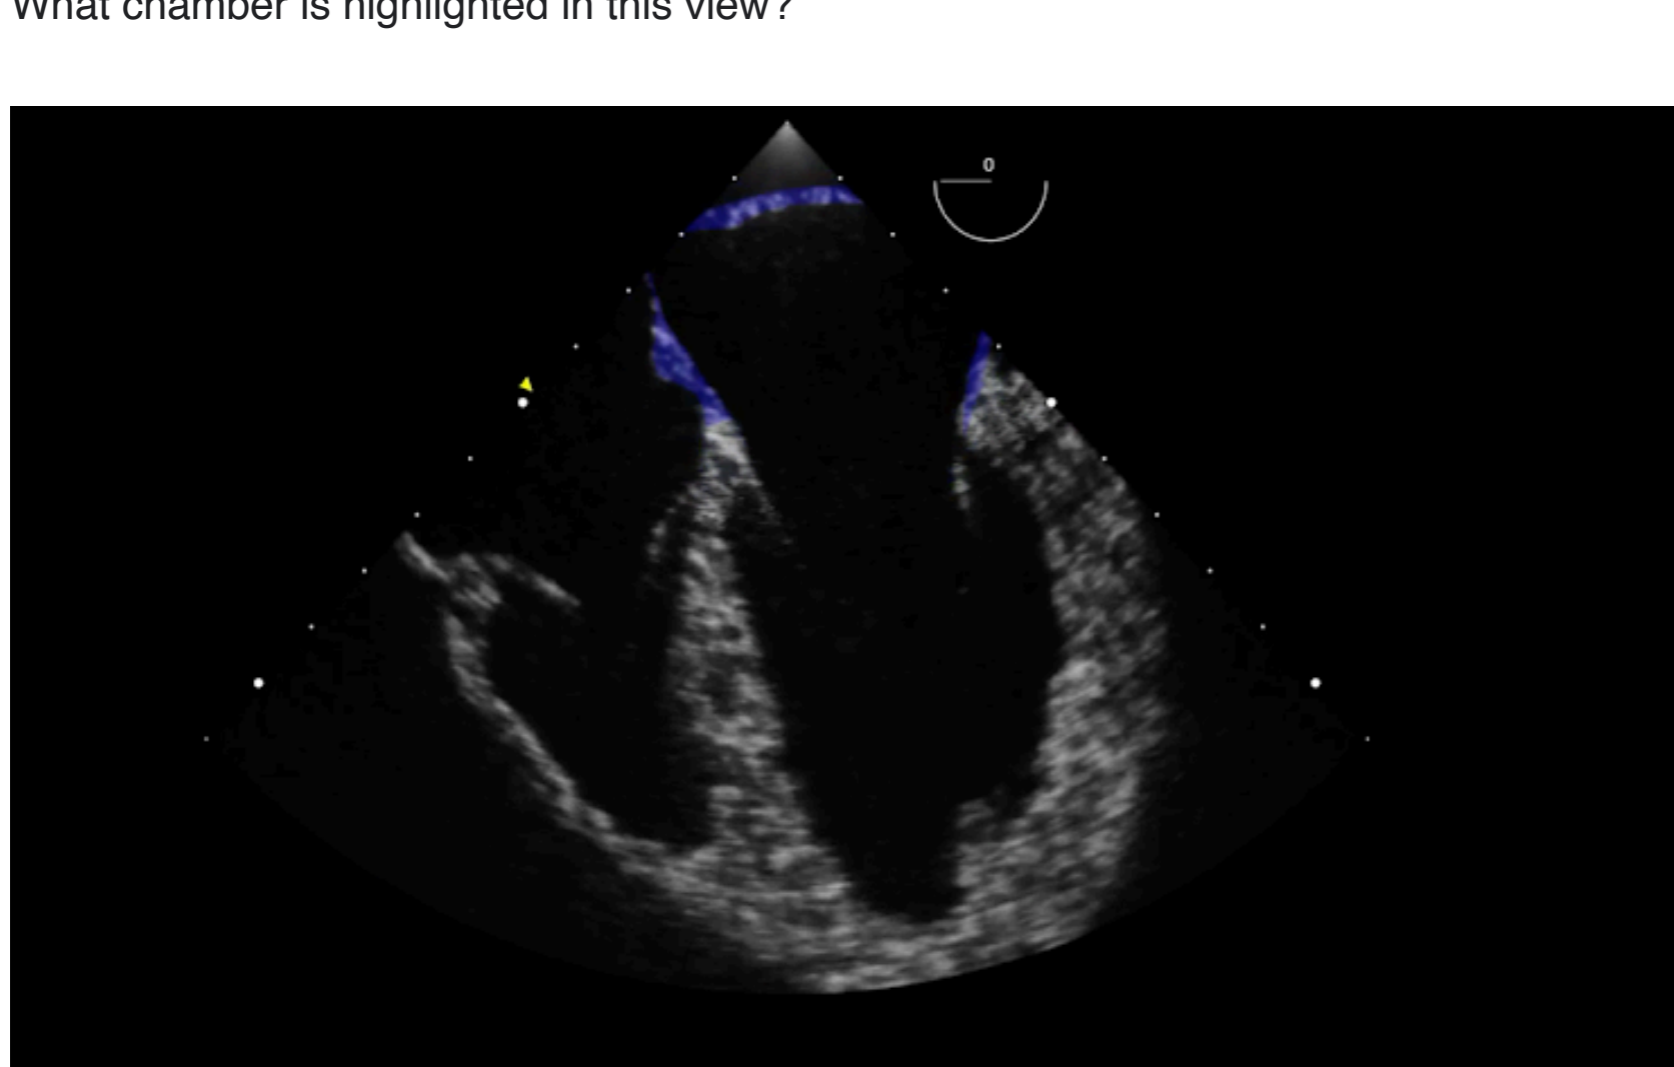

Mark only one oval.

- Left ventricle
- Right ventricle
- Left atrium
- Right atrium

7. From the Mid-Esophageal Four Chamber view, what probe maneuver was performed to obtain this view?

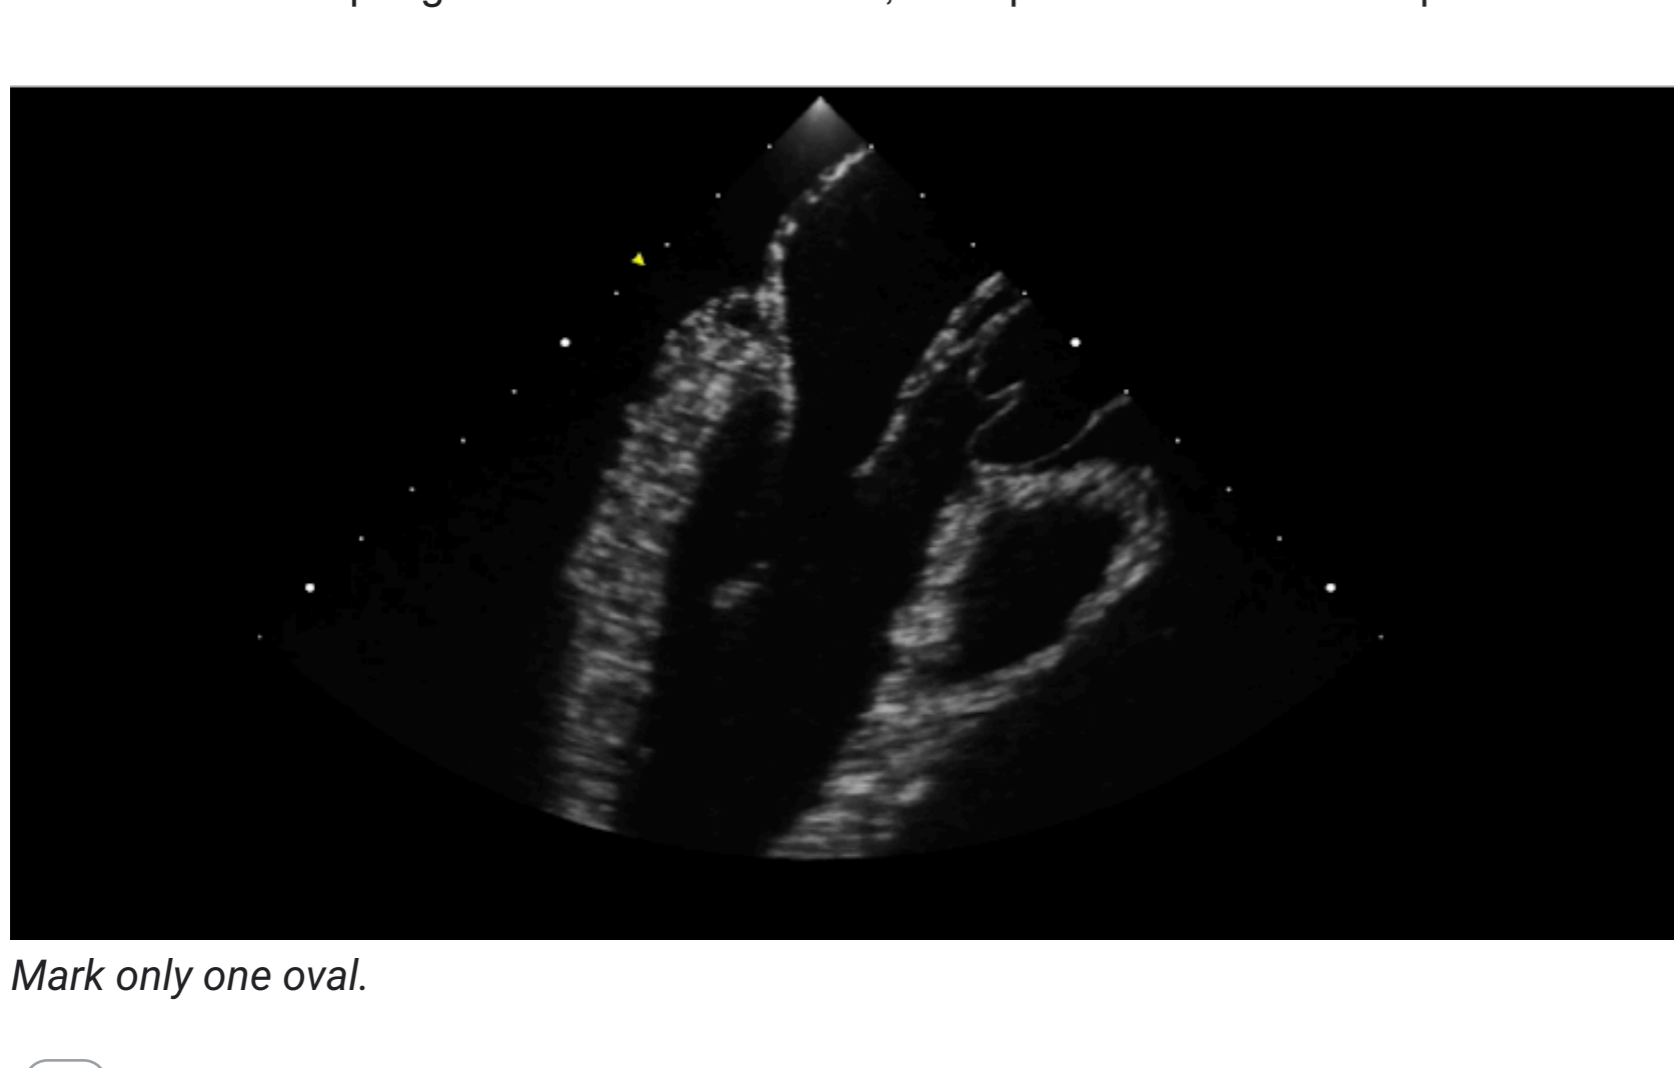

Mark only one oval.

- Rotate counterclockwise
- Increase angle to 120°
- Rotate clockwise
- Increase angle to 90°

8. What indication is this view use for?

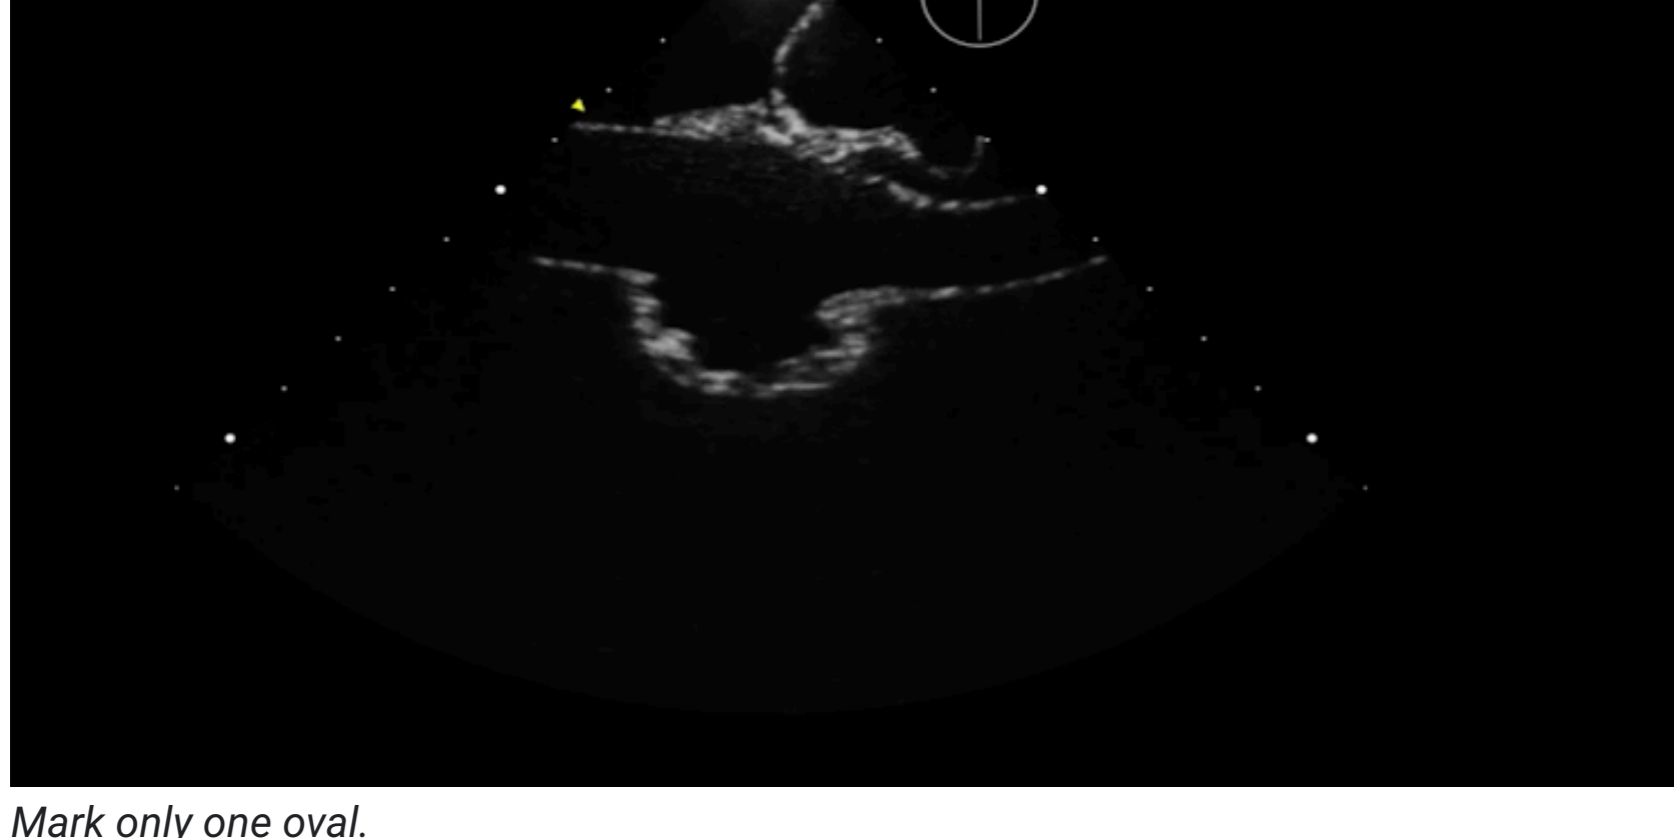

Mark only one oval.

- Evaluate Heart function & resuscitation compression efficacy during cardiac arrest
- Diagnosing cardiac tamponade
- Assess volume status & guide catheter placement
- Evaluate circumferential left & right ventricular function

9. What is the name of this view?

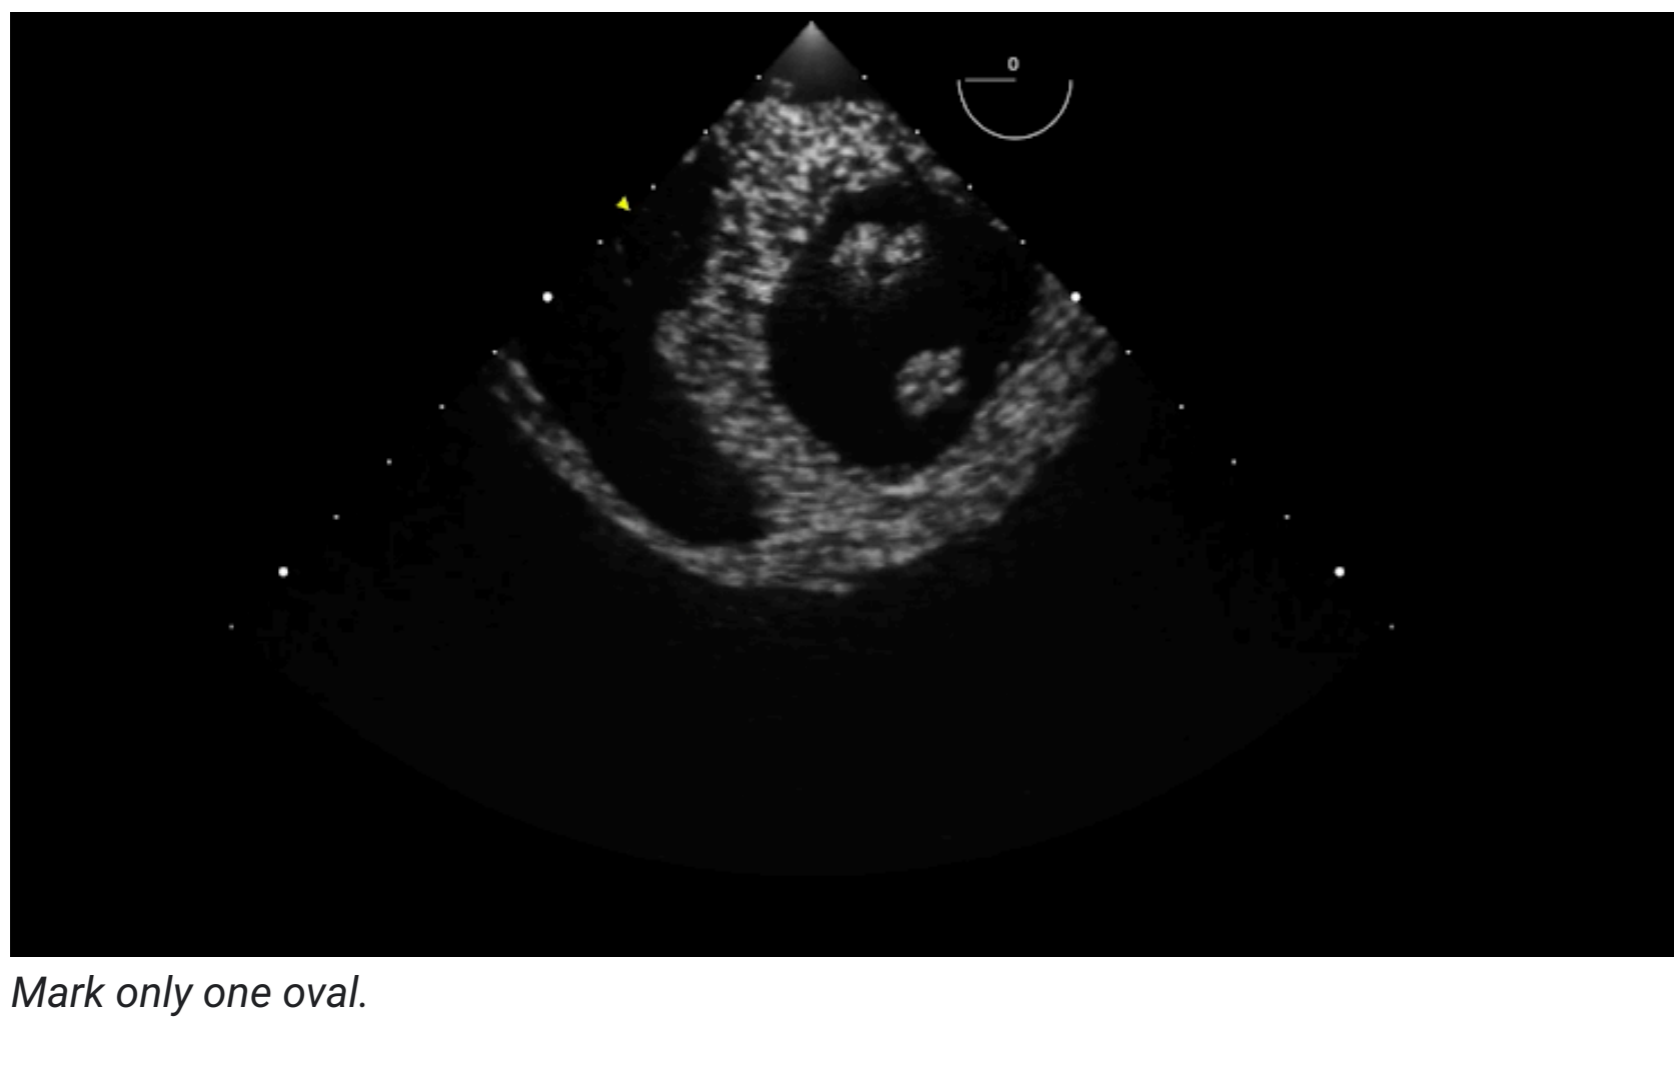

Mark only one oval.

- Mid-Esophageal Bicaval
- Transgastric Mid-Short Axis
- Mid-Esophageal Long Axis
- Mid-Esophageal Four Chamber

10. What structure is highlighted in blue on this picture?

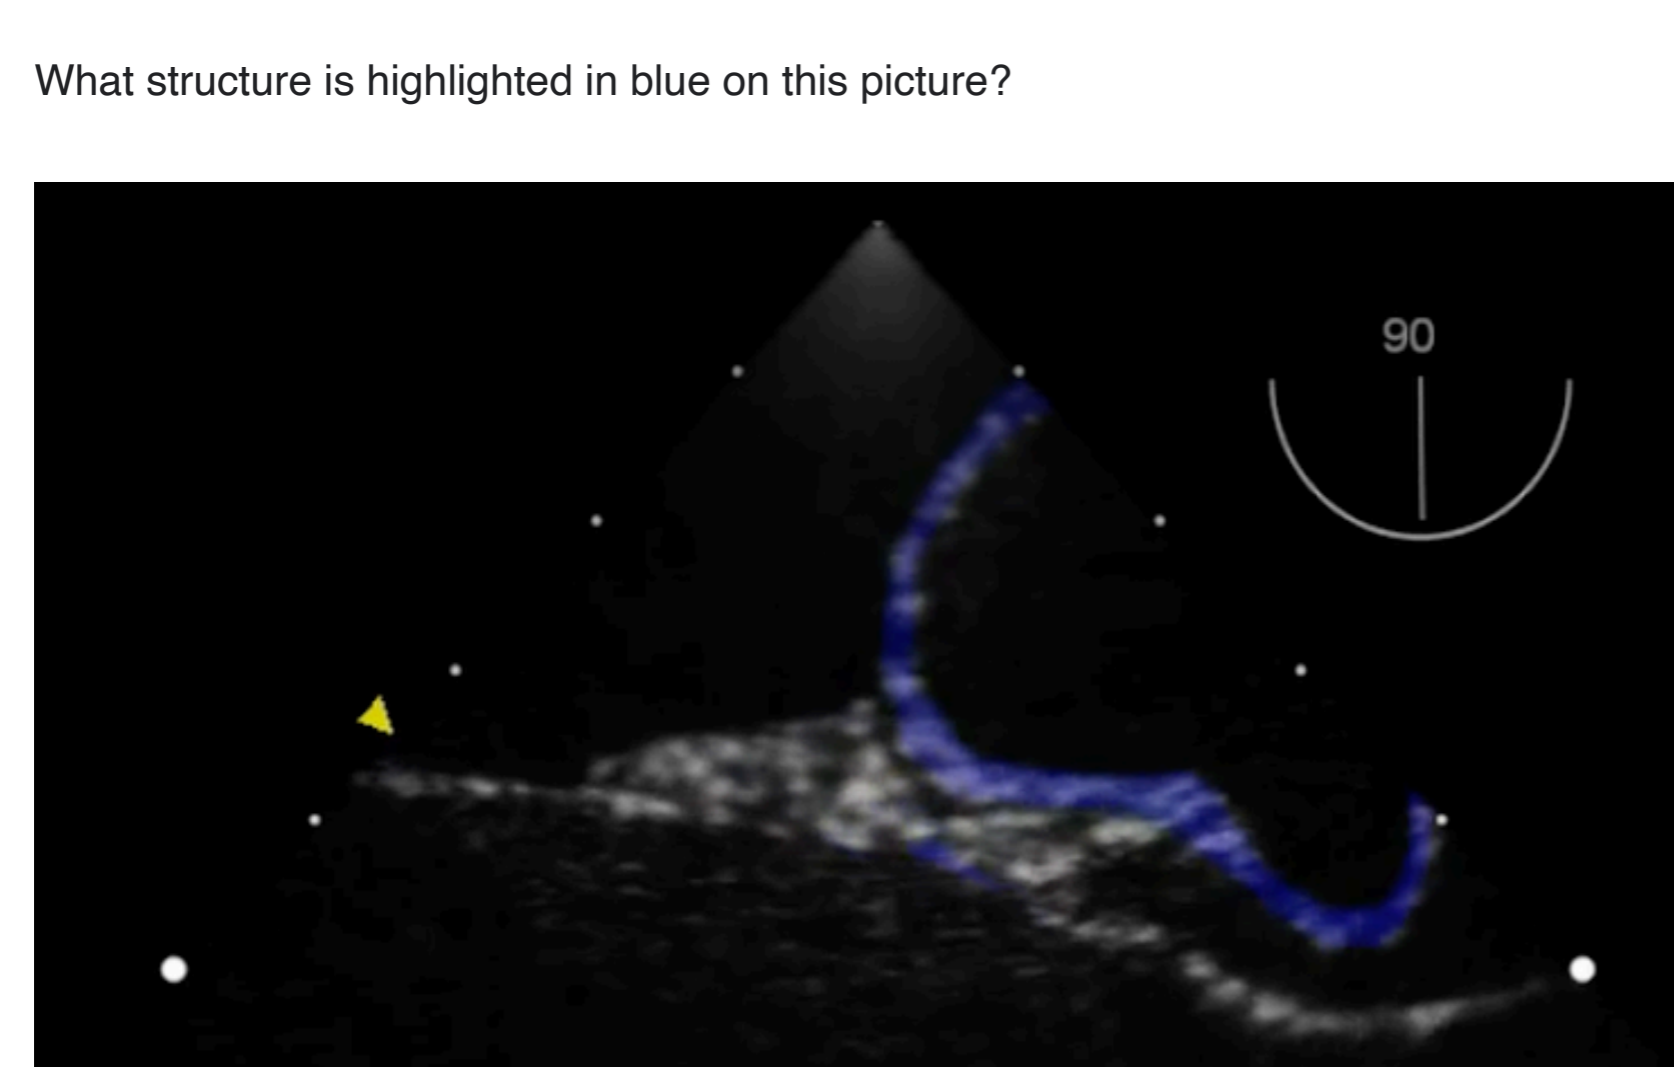

Mark only one oval.

- Left Atrium
- Right Atrium
- Left Ventricle
- Right Ventricle

11. What is the best probe to use for long axis transthoracic echocardiography?

Mark only one oval.

- Linear probe
- Curvilinear probe
- Rib probe
- Phased array probe

12. What structure is the red arrow pointing to?

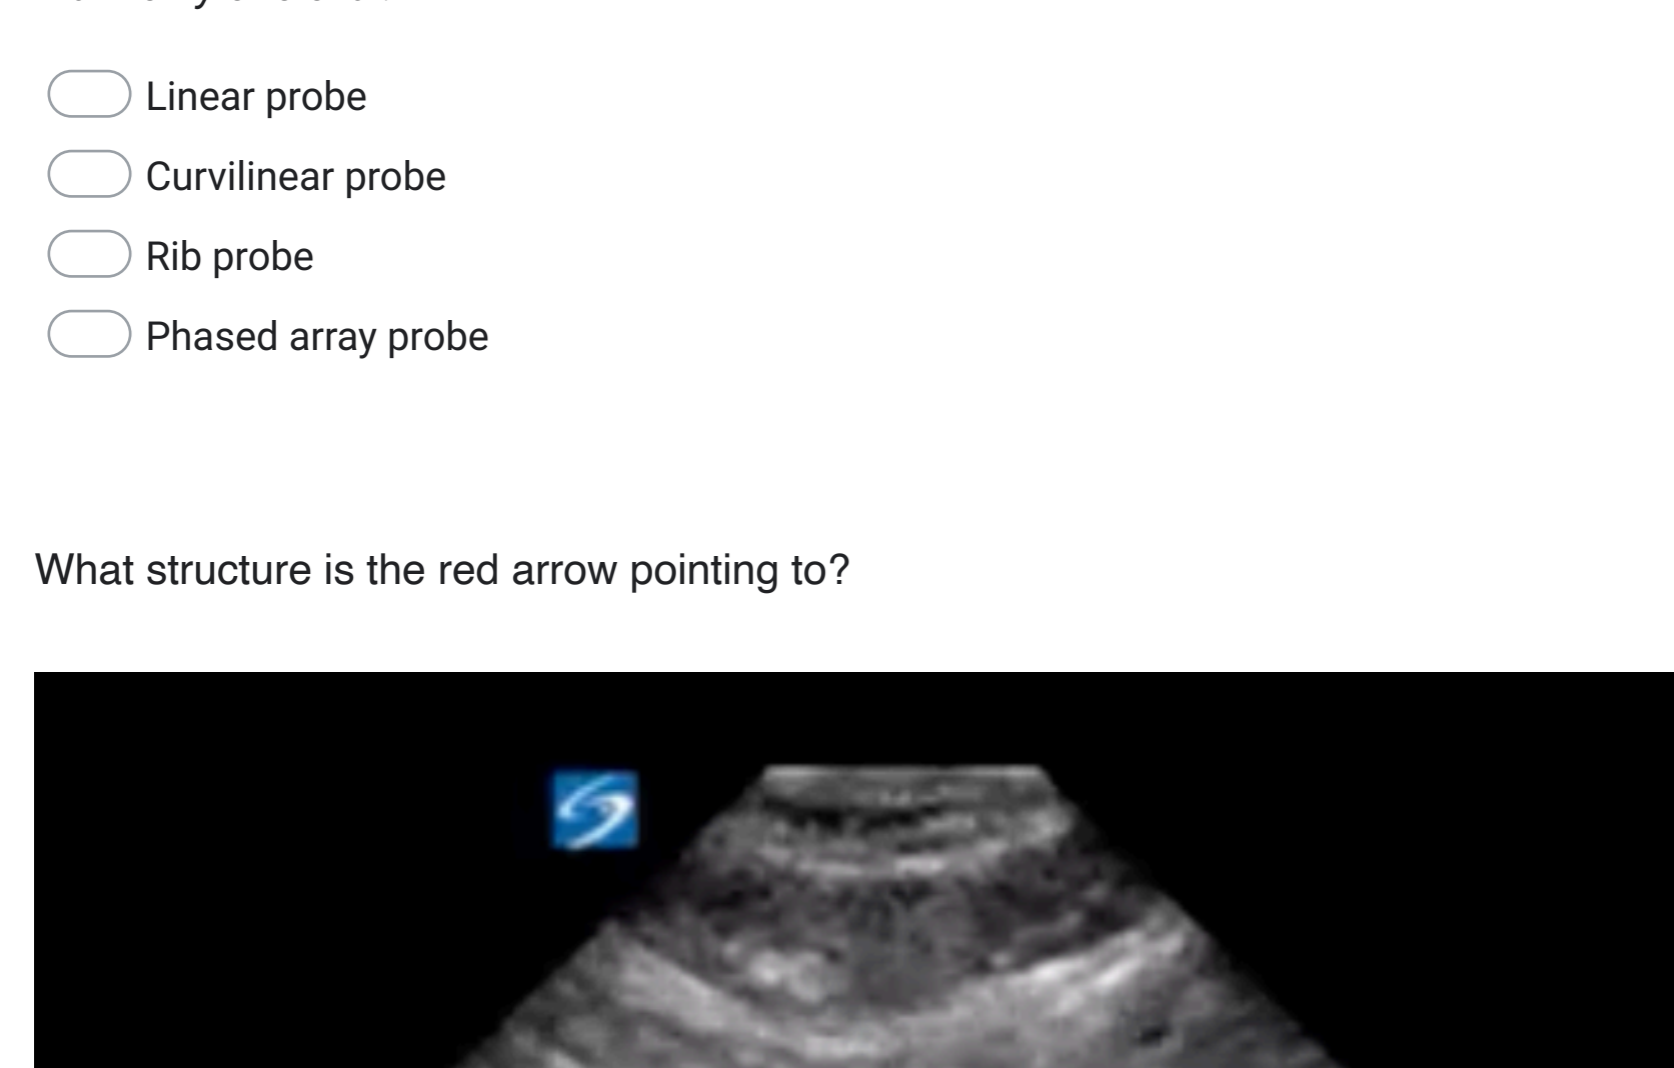

Mark only one oval.

- Tricuspid Valve
- Mitral Valve
- Aortic Valve
- Pulmonary Valve

13. What Chamber of the heart is the red arrow pointing to on this image?

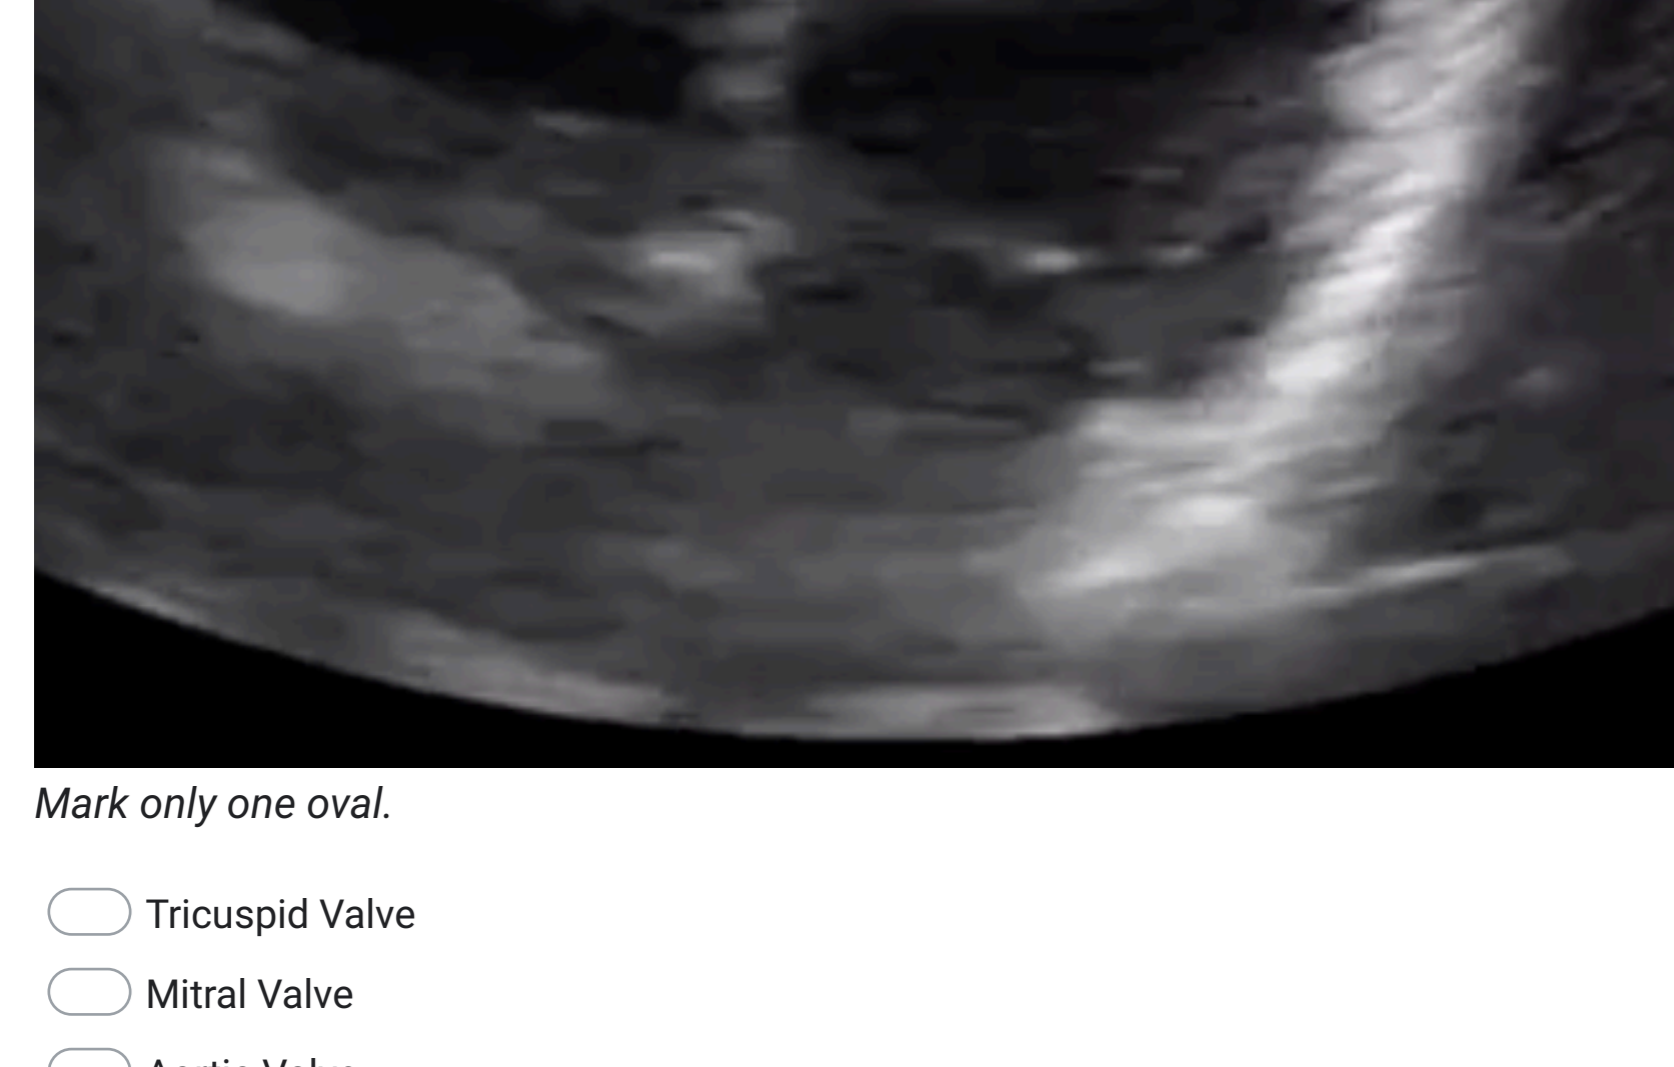

Mark only one oval.

- Right Ventricle
- Left Ventricle
- Right Atrium
- Left Atrium

14. Which of the following can be done to improve image quality when trying to obtain an apical four chamber view of the heart?

Mark only one oval.

- Have the patient stand up and bend forward at the waist
- Place the patient in the left lateral decubitus position
- Place the patient in the right lateral decubitus position
- Place the patient in the Bahner position

15. What structure is indicated by the red arrow?

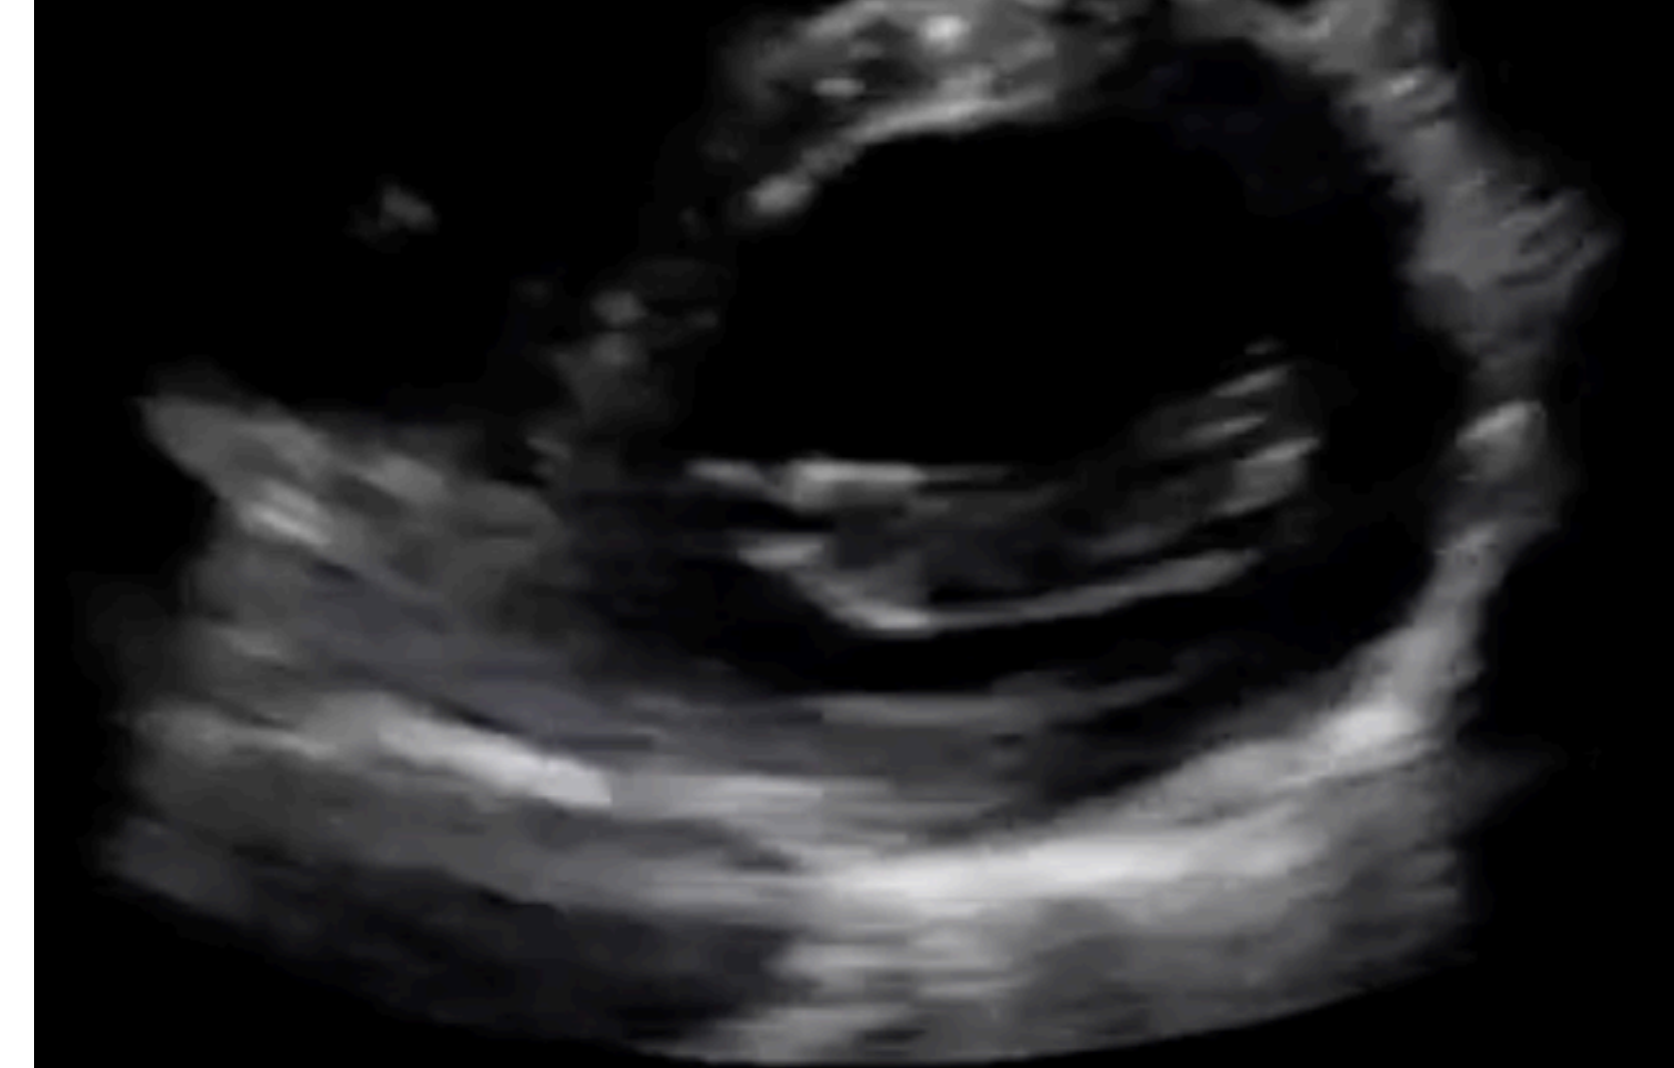

Mark only one oval.

- Pectinate Muscle
- Left Ventricular Band
- Papillary Muscle
- Moderator Band
