# Supplementary material
Source: Research Square preprint supplement (doi:10.21203/rs.3.rs-9271975/v1)
Supplement: Supplementary file 2 [file b47a036fefd5a4fe26640ba6.docx]

**Additional File 1: Beginner’s Ultrasound (BUS) Curriculum**

For a Medical Student to pass Beginner's Ultrasound and move on to the Intermediate Ultrasound curriculum they must:

1. Attend all 4 required BUS scanning sessions during the academic year
2. Review all BUS pre-scan materials
3. Complete all BUS post-scan quizzes (obtaining a score ≥ 70%)
4. Complete and log 6 hours of extra scanning experience at university curriculum sessions, conferences, or extracurricular club sessions
   1. The 4 required BUS scans do not count toward these 6 hours
5. Complete + log 6 hours (1st semester) + 6 hours (2nd semester) of Trained Simulated Ultrasound Patient (TSUP) participation
   1. *Total of 12 hours by the end of the year*
6. Complete the BUS final exam with a score ≥ 70%
7. Beginner Ultrasound is graded on a pass/fail basis

**Additional File 2: Advanced Ultrasound (AUS) Curriculum**

1. Attend 5/8 AUS scanning sessions and complete corresponding post-quizzes
2. Complete all AUS post-scan quizzes for attended sessions (obtaining a score ≥ 70%)
3. Attend 2/3 pathology lectures
4. Complete 9 hours Trained Simulated Ultrasound Patient (TSUP) participation
5. Complete 6 hours of ultrasound proctoring
6. Complete the pre- and post-test with a score ≥ 70%
