# Supplementary material
Source: Research Square preprint supplement (doi:10.21203/rs.3.rs-9271975/v1)

Table 1. Paired T-Test Results for Knowledge Scores


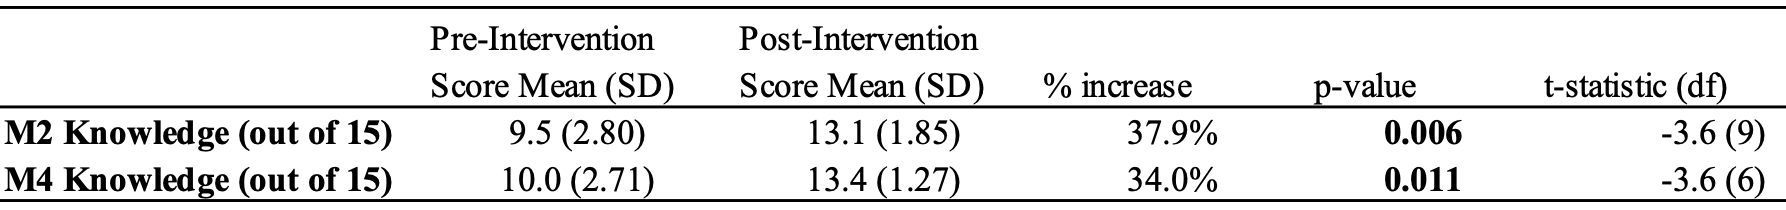


Table 2. Paired T-Test Results for Confidence Scores


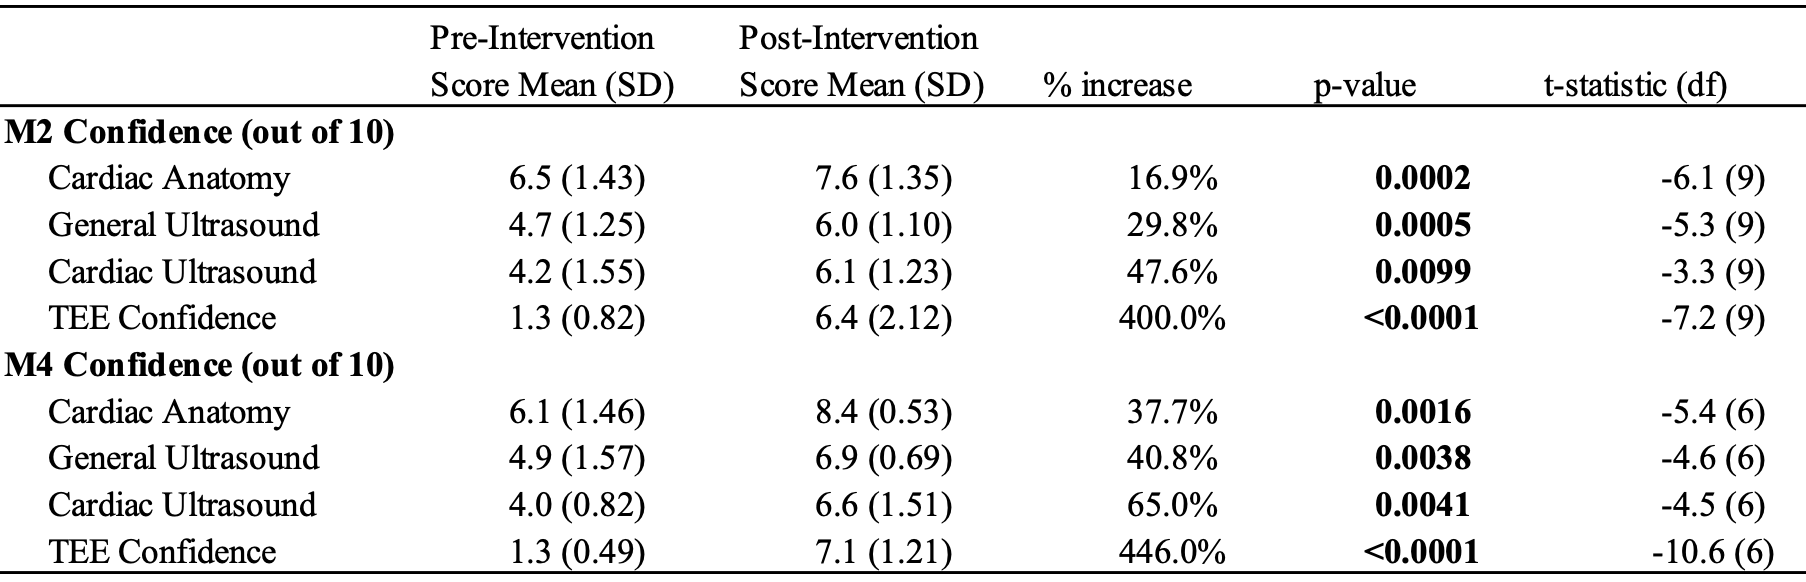


Table 3. Paired T-Test Results for Confidence Scores in M1s


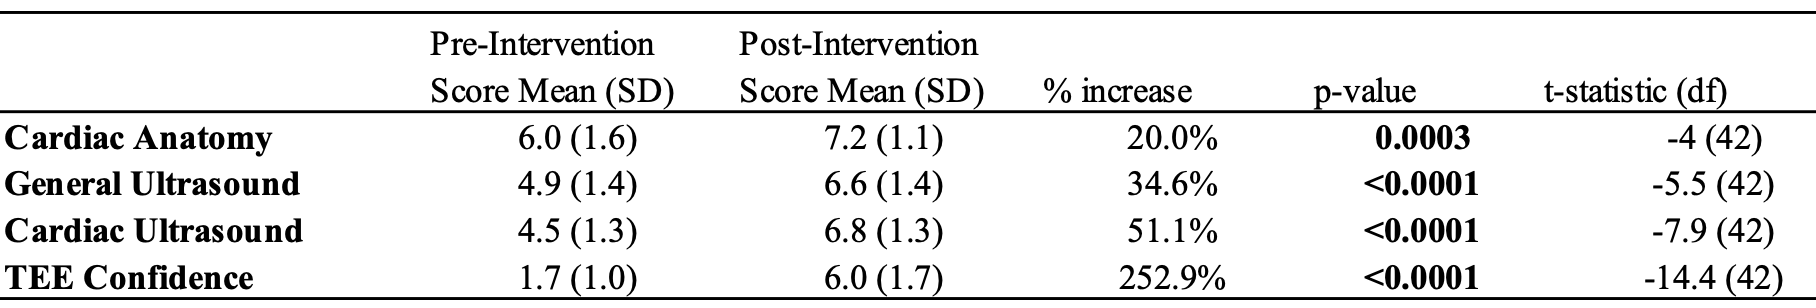

Supplement: Supplementary file 3 [file e21e5ef5d1d5fa102ac35890.docx]
